# Supplementary material for: Environmental adversity is associated with lower investment in collective actions
Source: PLoS One. 2020 Jul 30;15(7):e0236715. doi: 10.1371/journal.pone.0236715 (PMC7392252; doi:10.1371/journal.pone.0236715)
Supplement: S5 Table — Values are unstandardized coefficients with standard deviations in brackets. (XLSX) [file pone.0236715.s005.xlsx]

## Sheet: Sheet1
Country	N	Current adversity	Health	Number children	Volunteering	Political action	Age
Albania	333	5.57 (2.16)	3.88 (0.79)	2.78 (1.38)	1.25 (1.66)	0.44 (0.81)	45.36 (12.77)
Algeria	244	7.97 (1.68)	3.50 (0.78)	4.67 (2.49)	1.18 (1.90)	0.56 (1.04)	40.49 (12.59)
Argentina	458	5.74 (2.79)	3.83 (0.88)	2.98 (1.80)	0.30 (0.77)	0.43 (0.82)	47.22 (16.18)
Bangladesh	497	6.46 (1.72)	3.62 (0.78)	3.15 (1.77)	2.94 (3.48)	0.33 (0.87)	37.42 (11.01)
Bosnia	403	6.31 (1.66)	3.74 (0.92)	2.48 (1.78)	0.34 (0.74)	0.43 (0.82)	44.54 (13.75)
Canada	616	6.06 (2.69)	4.19 (0.87)	2.68 (1.60)	1.07 (1.58)	1.25 (1.02)	50.05 (15.80)
Chile	412	7.05 (2.60)	3.75 (0.77)	2.83 (1.52)	0.65 (0.97)	0.49 (0.93)	43.74 (13.70)
India	747	7.36 (1.42)	3.80 (0.89)	3.46 (2.04)	1.05 (2.16)	0.71 (1.14)	40.36 (13.97)
Japan	475	6.03 (2.83)	3.62 (0.80)	2.30 (1.22)	0.33 (0.86)	0.83 (0.76)	51.89 (13.61)
Kyrgyzstan	369	6.81 (1.28)	3.58 (0.77)	2.94 (1.64)	0.33 (0.81)	0.27 (0.62)	42.17 (13.94)
Macedonia	366	6.83 (1.96)	3.84 (0.83)	2.14 (0.92)	0.67 (1.54)	0.68 (1.05)	46.79 (13.76)
Mexico	396	5.74 (2.64)	3.81 (0.79)	3.37 (2.09)	0.79 (1.52)	0.33 (0.72)	40.78 (14.35)
Moldova	331	7.35 (1.90)	2.95 (0.82)	2.19 (1.12)	0.81 (1.77)	0.54 (0.91)	46.79 (14.15)
Montenegro	274	4.64 (2.73)	3.52 (0.94)	2.99 (1.53)	0.24 (0.59)	0.55 (0.96)	48.42 (13.32)
Peru	463	7.93 (1.79)	3.53 (0.74)	2.97 (1.84)	0.69 (1.07)	0.52 (0.86)	40.54 (11.94)
Philippines	477	6.49 (2.07)	3.71 (0.84)	3.54 (1.99)	1.20 (1.86)	0.25 (0.69)	42.08 (14.07)
Puerto Rico	265	7.96 (2.12)	3.97 (0.81)	2.76 (1.42)	0.89 (1.40)	0.48 (0.94)	49.28 (16.03)
Serbia	373	6.39 (2.67)	3.40 (0.87)	2.04 (1.16)	0.12 (0.42)	0.66 (1.12)	50.74 (13.88)
South Africa	908	6.10 (2.61)	4.16 (0.89)	2.73 (1.68)	0.98 (1.38)	0.62 (0.99)	43.01 (14.31)
South Korea	330	6.26 (1.79)	3.95 (0.62)	2.28 (0.93)	0.86 (1.47)	0.83 (0.97)	45.27 (10.20)
Spain	262	6.49 (1.89)	3.72 (0.76)	2.63 (1.57)	0.21 (0.59)	0.44 (0.79)	53.04 (16.22)
Tanzania	373	7.76 (1.98)	3.77 (0.88)	3.83 (2.17)	3.14 (3.33)	0.47 (0.73)	42.24 (12.85)
Uganda	157	8.16 (1.51)	4.02 (0.72)	3.19 (1.76)	1.66 (1.61)	0.59 (1.00)	34.00 (7.62)
United States	389	5.44 (2.65)	4.20 (0.74)	2.69 (1.53)	1.81 (2.13)	1.31 (0.94)	47.02 (14.59)
Vietnam	396	5.69 (1.40)	3.58 (0.87)	3.29 (1.75)	2.11 (2.43)	0.06 (0.26)	46.47 (14.47)
Zimbabwe	303	7.67 (2.15)	3.82 (0.93)	3.62 (2.24)	0.97 (1.01)	0.17 (0.56)	39.20 (13.37)
Mean	408.346	6.63	3.75	2.94	1.02	0.55	44.57
SD	156.918	0.93	0.27	0.59	0.78	0.28	4.63
Range	157-908	1-10	1-5	1-8	0-14	0-4	16-98
